# Supplementary material
Source: HighWire-hosted journal article supplement (https://erj.ersjournals.com/content/56/5/1901826)
Supplement: inline-supplementary-material-2 [file inline-supplementary-material-2.pdf]

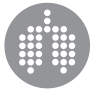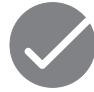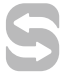

SHAREABLE PDF

# Cyclophilin inhibitors restrict Middle East respiratory syndrome coronavirus *via* interferon- $\lambda$ *in vitro* and in mice

Lucie Sauerhering<sup>1</sup>, Alexandra Kupke<sup>1</sup>, Lars Meier<sup>1</sup>, Erik Dietzel<sup>1</sup>, Judith Hoppe<sup>2</sup>, Achim D. Gruber<sup>2</sup>, Stefan Gattenloehner<sup>3</sup>, Biruta Witte<sup>4</sup>, Ludger Fink<sup>5</sup>, Nina Hofmann<sup>6</sup>, Tobias Zimmermann<sup>6</sup>, Alexander Goesmann <sup>6</sup>, Andrea Nist<sup>7</sup>, Thorsten Stiewe<sup>7,8</sup>, Stephan Becker<sup>1,10</sup>, Susanne Herold<sup>9,10</sup> and Christin Peteranderl <sup>9,10</sup>

**Affiliations:** <sup>1</sup>Institute of Virology, Philipps University of Marburg, Member of the German Center for Infection Research (DZIF), TTU Emerging Infections, Marburg, Germany. <sup>2</sup>Dept of Veterinary Pathology, Free University Berlin, Berlin, Germany. <sup>3</sup>Dept of Pathology, University Hospital of Giessen, Giessen, Germany. <sup>4</sup>Dept of General and Thoracic Surgery, University Hospital of Giessen, Giessen, Germany. <sup>5</sup>Institut für Pathologie und Zytologie, Wetzlar, Germany. <sup>6</sup>Bioinformatics and System Biology, University of Giessen, Giessen, Germany. <sup>7</sup>Genomics Core Facility, Philipps University of Marburg, Marburg, Germany. <sup>8</sup>Institute of Molecular Oncology, Universities of Giessen and Marburg Lung Center, Member of the German Center for Lung Research (DZL), Marburg, Germany. <sup>9</sup>Dept of Internal Medicine II, University of Giessen and Marburg Lung Center (UGMLC), Member of the German Center for Lung Research (DZL), Giessen, Germany. <sup>10</sup>Equal contribution.

**Correspondence:** Christin Peteranderl, Universities of Giessen and Marburg Lung Center, Department of Internal Medicine II, Klinikstr. 36, D-35392 Giessen, Germany. E-mail: Christin.Peteranderl@innere.med.uni-giessen.de

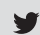

@ERSpublications

The cyclophilin inhibitors cyclosporin A and alisporivir activate host innate immunity by induction of interferon- $\lambda$  *via* activation of IRF1 in human lung epithelial cells and *in vivo*, resulting in a significant inhibition of MERS-CoV <https://bit.ly/37gzIBH>

**Cite this article as:** Sauerhering L, Kupke A, Meier L, *et al.* Cyclophilin inhibitors restrict Middle East respiratory syndrome coronavirus *via* interferon- $\lambda$  *in vitro* and in mice. *Eur Respir J* 2020; 56: 1901826 [<https://doi.org/10.1183/13993003.01826-2019>].

This single-page version can be shared freely online.

**ABSTRACT** While severe coronavirus infections, including Middle East respiratory syndrome coronavirus (MERS-CoV), cause lung injury with high mortality rates, protective treatment strategies are not approved for clinical use.

We elucidated the molecular mechanisms by which the cyclophilin inhibitors cyclosporin A (CsA) and alisporivir (ALV) restrict MERS-CoV to validate their suitability as readily available therapy in MERS-CoV infection.

Calu-3 cells and primary human alveolar epithelial cells (hAECs) were infected with MERS-CoV and treated with CsA or ALV or inhibitors targeting cyclophilin inhibitor-regulated molecules including calcineurin, nuclear factor of activated T-cells (NFATs) or mitogen-activated protein kinases. Novel CsA-induced pathways were identified by RNA sequencing and manipulated by gene knockdown or neutralising antibodies. Viral replication was quantified by quantitative real-time PCR and 50% tissue culture infective dose. Data were validated in a murine MERS-CoV infection model.

Both CsA and ALV reduced MERS-CoV titres and viral RNA replication in Calu-3 cells and hAECs, improving epithelial integrity. While neither calcineurin nor NFAT inhibition reduced MERS-CoV propagation, blockade of c-Jun N-terminal kinase diminished infectious viral particle release but not RNA

accumulation. Importantly, CsA induced interferon regulatory factor 1 (IRF1), a pronounced type III interferon (IFN $\lambda$ ) response and expression of antiviral genes. Downregulation of IRF1 or IFN $\lambda$  increased MERS-CoV propagation in the presence of CsA. Importantly, oral application of CsA reduced MERS-CoV replication *in vivo*, correlating with elevated lung IFN $\lambda$  levels and improved outcome.

We provide evidence that cyclophilin inhibitors efficiently decrease MERS-CoV replication *in vitro* and *in vivo via* upregulation of inflammatory antiviral cell responses, in particular IFN $\lambda$ . CsA might therefore represent a promising candidate for treating MERS-CoV infection.
